# Supplementary material
Source: publisher figshare collection journal article supplement (https://gsapubs.figshare.com/ndownloader/files/22743395)

TABLE 1. RIVER BASIN AREAS DRAINING TO LAKE WINNIPEG SUBBASINS

| River basin                      | Receiving basin     | Period            | Area (km <sup>2</sup> ) | Source and comment                                                                           |
|----------------------------------|---------------------|-------------------|-------------------------|----------------------------------------------------------------------------------------------|
| Saskatchewan River               | North Basin         | 4.7 to 0 ka       | 335 900                 | National Atlas of Canada (NAC), 1985                                                         |
| Manitoba-Winnipegosis            | North Basin         | 7.7 to 0 ka       | 80 300                  | Last and Teller, 1983*; includes estimated (this study) lake areas of 10 500 km <sup>2</sup> |
| North Basin local <sup>†</sup>   | North Basin         | 7.7 to 0 ka       | 82 730                  | this study; estimated from NAC, 1985, 1: 7 500 000 scale map                                 |
| Central Basin local <sup>§</sup> | North Basin         | 7.7 to 0 ka       | 26 230                  | this study; estimated from NAC, 1985, 1: 7 500 000 scale map                                 |
| Assiniboine River                | North Basin         | 7.5 to ca./< 4 ka | 180 200                 | NAC, 1985; modified by including lower 1800 km <sup>2</sup> in Red River basin               |
|                                  | South Basin         | >7.5 & ca./< 4 ka |                         |                                                                                              |
| Red River                        | South Basin         | ~8 to 0 ka        | 107 300                 | NAC, 1985; see note above                                                                    |
| Winnipeg River                   | South Basin         | ~8 to 0 ka        | 135 800                 | NAC, 1985                                                                                    |
| South Basin local <sup>#</sup>   | Central/North Basin | ~8 to 0 ka        | 10 670                  | this study; estimated from NAC, 1985, 1: 7 500 000 scale map                                 |
| Sum                              |                     |                   | 959 130                 | 2.4 % less than the total catchment (982 900 km <sup>2</sup> ) in NAC, 1985.                 |

\*From Last, W.M., and Teller, J.T., 1983, Holocene climate and hydrology of the Lake Manitoba basin, *in* Teller, J.T., and Clayton, L., eds., Glacial Lake Agassiz: St. John's, Newfoundland, Geological Association of Canada Special Paper 26, p. 333-353.

<sup>†</sup>Between Pigeon and Warren Landing sills; includes land and lake areas.

<sup>§</sup>Between Hecla-Black and Pigeon sills; includes land and lake areas.

<sup>#</sup>South of Hecla-Black Sill; includes land and lake areas.

TABLE 2. CLIMATE-SUSTAINABLE LAKE AREAS AND POTENTIAL OPEN-LAKE AREAS FOR SOUTHERN BASIN OF LAKE WINNIPEG

| Age<br>(cal. yr B.P./ ka) | South Basin<br>drainage<br>area* | Climate-sustainable lake area $A$ (km <sup>2</sup> ) <sup>†</sup> |                   |                                   | Potential open-lake area<br>(km <sup>2</sup> ) <sup>#</sup> |
|---------------------------|----------------------------------|-------------------------------------------------------------------|-------------------|-----------------------------------|-------------------------------------------------------------|
|                           |                                  | Grassland Border                                                  | Central Grassland | Central Grassland sr <sup>§</sup> |                                                             |
| 8 260/ 7.5                | +AR                              | 19 431                                                            | 2 695             | 677                               | 500                                                         |
| 8 260/ 7.5                | -AR                              | 11 363                                                            | 1576              | 396                               | 500                                                         |
| 7 560/ 6.7                | -AR                              | 11 363                                                            | 1576              | 396                               | 610                                                         |
| 6 680/ 5.9                | -AR                              | 11 363                                                            | 1576              | 396                               | 860                                                         |
| 5 510/ 4.8                | -AR                              | 11 363                                                            | 1576              | 396                               | 1280                                                        |
| 4 440/ 4.0                | -AR                              | 11 363                                                            | 1576              | 396                               | 1475                                                        |
| 4 440/ 4.0                | +AR                              | 19 431                                                            | 2 695             | 677                               | 1475                                                        |
| 3 750/ 3.5                | +AR                              | 19 431                                                            | 2 695             | 677                               | 1600                                                        |
| 3 060/ 2.0                | +AR                              | 19 431                                                            | 2 695             | 677                               | 2730                                                        |

\*433 970 km<sup>2</sup> with Assiniboine River drainage = +AR; 253 770 km<sup>2</sup> without Assiniboine River drainage = -AR.

<sup>†</sup>Calculated using  $A = A_b q / (q + e_p - p)$ .

<sup>§</sup>sr = suppressed runoff.

<sup>#</sup>Calculated by open-lake tilting model. Ground uplift since  $t$  years ago at a site relative to Isobase 5 (Teller and Thorleifson, 1983) was computed from  $a(\exp(t/*)-1)$  (equation 1) (Todd et al., 2000; Tackman et al., 1998; Peltier, W.R., 1994, Ice age paleotopography: Science, v. 265, p. 195-201). The site-specific amplitude parameter  $a = RU_B / (\exp(9500/*)-1)$  where  $RU_B$  = height of the Burnside level of Lake Agassiz at the site above its elevation at Isobase 5 south of Lake Winnipeg, and the age of the Burnside level = 9500 cal. yr B.P. The relaxation parameter  $*$ , assumed to be a constant throughout the Lake Winnipeg basin, was evaluated at 3 500 years in the Lake Winnipegosis area where the gradients and ages of several postglacial shorelines including the Burnside level are known (Tackman et al., 1998);  $*$  was found by solving simultaneous equations in the form of equation 1, where the parameters,  $a = RU_B$ , a constant for the site, and  $t$  were evaluated or substituted by the known gradient and age of each paleoshoreline around Lake Winnipegosis. At age  $t$ , the elevation  $E_t$  of a site =  $E_p - RU_t$  (equation 2) where  $E_p$  is the present site elevation, and  $RU_t$  is the site uplift since  $t$  cal. yr B.P. By using equation 2, the past elevation was computed at points in southern, central, and northern Lake Winnipeg to determine the slope or tilt of a former level lake surface achieved for 7 phases since 7.9 ka (8 840 cal. yr B.P.). Using a geographic information system and a digital elevation and bathymetry model of the Lake Winnipeg basin constructed with an allowance for ongoing sediment accumulation, the intersections and enclosed areas of the 7 tilted planes with the basin topography and bathymetry model at sill elevations were obtained to represent potential lake shorelines (Fig. 2) and areas of water surfaces overflowing their sills in subbasins and basins of Lake Winnipeg.

TABLE 3. RADIOCARBON AGE DETERMINATIONS BY ACCELERATOR MASS SPECTROMETRY OF FOSSILS IN BASAL LAKE WINNIPEG SEDIMENTS (LWS)

| Site | Latitude*  | Longitude* | LWS*<br>base<br>(cm) | Level of<br>date*<br>(cm) | Fossil material dated*                                                                                 | Lab number* | Conventional<br>age ( $^{14}\text{C}$ yrs<br>B.P.)* | Calibrated age (cal.<br>yrs B.P.) and 1- sigma<br>age range <sup>†</sup> |
|------|------------|------------|----------------------|---------------------------|--------------------------------------------------------------------------------------------------------|-------------|-----------------------------------------------------|--------------------------------------------------------------------------|
| 104  | 53° 35.1'N | 98° 05.1'W | >243                 | 237-243                   | twigs of wood <sup>§</sup>                                                                             | CAMS-32 189 | 7 700 Å 50                                          | (8 440) 8 530-8 410                                                      |
| 106  | 53° 34.7'N | 98° 05.8'W | 182                  | 176-182                   | <i>Candona rawsoni</i> (Tressler)<br>and <i>C. subtriangulata</i> (Benson<br>and MacDonald) ostracodes | CAMS-32 191 | 6 560 Å<br>200 <sup>#</sup>                         | (7 560) 7 680-7 410                                                      |
| 122  | 50° 39.4'N | 96° 48.3'W | 435                  | 425-433                   | <i>Scirpus</i> sp. seed                                                                                | CAMS-17 434 | 4 040 Å 70                                          | (4 520) 4 590-4 420                                                      |
| 201  | 53° 12.0'N | 99° 06.9'W | 439                  | 434-439                   | <i>Picea</i> needles                                                                                   | CAMS-35 499 | 4 800 Å 70                                          | (5 580) 5 600-5 470                                                      |
| 202  | 53° 43.2'N | 98° 36.2'W | 179                  | 174-179                   | ostracodes as at site 106                                                                              | CAMS-32 192 | 6 460 Å 60 <sup>#</sup>                             | (7 410) 7 430-7 310                                                      |
| 204  | 53° 34.0'N | 98° 06.3'W | >579                 | 362-373                   | ostracodes as at site 106                                                                              | CAMS-38 676 | 6 350 Å 80 <sup>#</sup>                             | (7 410) 7 440-7 290                                                      |
| 204  | 53° 34.0'N | 98° 06.3'W | >579                 | 513-518                   | <i>Picea</i> sp. needle                                                                                | CAMS-38 678 | 6 750 Å 70                                          | (7 600) 7 670-7 570                                                      |
| 209  | 52° 30.9'N | 97° 34.8'W | 104                  | 95-97                     | <i>Juniperus communis</i> L. seed                                                                      | CAMS-35 497 | 3 730 Å 70                                          | (4 080) 4 170-3 970                                                      |
| 213  | 51° 52.4'N | 96° 56.5'W | 15                   | 10-15                     | <i>Picea</i> needle                                                                                    | CAMS-46 187 | 2 540 Å 60                                          | (2 720) 2 750-2 500                                                      |
| 215  | 51° 22.5'N | 96° 34.3'W | 361                  | 321.5                     | <i>Scirpus</i> sp. seed                                                                                | CAMS-34 554 | 3 950 Å 60                                          | (4 410) 4 500-4 310                                                      |
| 215  | 51° 22.5'N | 96° 34.3'W | 361                  | 348                       | <i>Scirpus</i> sp. seed                                                                                | CAMS-34 555 | 4 030 Å 50                                          | (4 510) 4 550-4 430                                                      |
| 217  | 51° 08.0'N | 96° 35.1'W | 302                  | 253-257                   | <i>Chenopodium</i> sp. seeds                                                                           | CAMS-46 191 | 3 910 Å 60                                          | (4 400) 4 420-4 250                                                      |
| 221  | 50° 56.1'N | 96° 37.0'W | 522                  | 523-528                   | <i>Scirpus</i> sp. seed**                                                                              | CAMS-38 680 | 4 190 Å 100                                         | (4 820) 4 850-4 550                                                      |
| 221  | 50° 56.1'N | 96° 37.0'W | 522                  | 526-527                   | <i>Sphaerium striatinum</i><br>(Lamarck) shell**                                                       | CAMS-35 616 | 3 970 Å 50 <sup>#</sup>                             | (4 540) 4 590-4 440                                                      |
| 222  | 50° 56.1'N | 96° 44.2'W | 735                  | 735-740                   | <i>Scirpus</i> sp. seed**                                                                              | CAMS-46 188 | 4 710 Å 50                                          | (5 460) 5 570-5 320                                                      |
| 223  | 50° 39.4'N | 96° 48.3'W | 687                  | 661-666                   | <i>Scirpus</i> sp. seed                                                                                | CAMS-34 551 | 4 000 Å 60                                          | (4 430) 4 530-4 410                                                      |
| 223  | 50° 39.4'N | 96° 48.3'W | 687                  | 721-726                   | <i>Scirpus</i> sp. seed**                                                                              | CAMS-46 186 | 4 030 Å 50                                          | (4 510) 4 550-4 430                                                      |
| 224  | 50° 33.0'N | 96° 47.2'W | >731                 | 577-582                   | <i>Helianthus</i> sp. seed                                                                             | CAMS-35 496 | 3 550 Å 70                                          | (3 850) 3 910-3 710                                                      |

TABLE 3 continued. RADIOCARBON AGE DETERMINATIONS BY ACCELERATOR MASS SPECTROMETRY OF FOSSILS IN BASAL LAKE WINNIPEG SEDIMENTS (LWS)

| Site | Latitude*              | Longitude*             | LWS*<br>base<br>(cm)                | Level of<br>date*<br>(cm) | Fossil material dated*                                                                 | Lab number*             | Conventional<br>age ( <sup>14</sup> C yrs<br>B.P.)* | Calibrated age (cal.<br>yrs B.P.) and 1 sigma<br>age range† |
|------|------------------------|------------------------|-------------------------------------|---------------------------|----------------------------------------------------------------------------------------|-------------------------|-----------------------------------------------------|-------------------------------------------------------------|
| 224  | 50° 33.0'N             | 96° 47.2'W             | >731                                | 577-582                   | <i>Scirpus</i> sp. seeds                                                               | CAMS-35 501             | 3 570 Å 120                                         | (3 850) 4 070-3 700                                         |
| 224  | 50° 33.0'N             | 96° 47.2'W             | >731                                | 584-589                   | <i>Scirpus</i> sp. seed <sup>§</sup>                                                   | CAMS-46 192             | 5 350 Å 50                                          | (6 180) 6 200-6 010                                         |
| 224  | 50° 33.0'N             | 96° 47.2'W             | >731                                | 705-710                   | <i>Musculium lacustre</i> (Müller)<br>and <i>Sphaerium rhomboideum</i><br>(Say) shells | CAMS-35 615             | 3 740 Å 60 <sup>#</sup>                             | (4 240) 4 370-4 160                                         |
| 215  | 51° 22.5'N             | 96° 34.3'W             | 361                                 | 348                       | <i>M. transversum</i> (Say) and <i>M.</i><br><i>lacustre</i> (Müller) shells           | CAMS-71 709             | 4 590 Å 40                                          | hwe (difference) <sup>#</sup><br>= 560 yrs                  |
| 215  | 51° 22.5'N             | 96° 34.3'W             | 361                                 | 348                       | <i>Scirpus</i> sp. seed                                                                | CAMS-34 555             | 4 030 Å 50                                          |                                                             |
| 221  | 50° 56.1'N             | 96° 37.0'W             | 522                                 | 523-528                   | <i>M. lacustre</i> (Müller) shell**                                                    | CAMS-71 710             | 4 420 Å 40                                          | hwe (difference) <sup>#</sup><br>= 230 yrs                  |
| 221  | 50° 56.1'N             | 96° 37.0'W             | 522                                 | 523-528                   | <i>Scirpus</i> sp. seed**                                                              | CAMS-38 680             | 4 190 Å 100                                         |                                                             |
| 223  | 50° 39.4'N             | 96° 48.3'W             | 687                                 | 507-509                   | <i>M. transversum</i> (Say) and <i>M.</i><br><i>lacustre</i> (Müller) shells           | CAMS-71 708             | 3 620 Å 40                                          | hwe (difference) <sup>#</sup><br>= 340 yrs                  |
| 223  | 50° 39.4'N<br>51° 40'N | 96° 48.3'W<br>96° 35'W | 687<br>from Winnipeg<br>River mouth | 507-509                   | <i>Scirpus</i> sp. seed<br>live <i>Strophitus undulatus</i> (Say)<br>shell, A.D. 1941  | CAMS-34 550<br>GSC-3281 | 3 280 Å 60<br>440 Å 100                             | hwe = 280 yrs <sup>#</sup>                                  |

\*From Todd et al., 1996, 2000.

†Calibrated with the program CALIB4.3 by using 1998 atmospheric decadal data set (Stuiver et al., 1998) and 50-year moving average.

<sup>§</sup>fossils show abrasion, indicating transportation, all others are assumed to have been deposited close to their source.<sup>#</sup>Corrected for hard-water effect (hwe) by subtracting 350 years, average of 4 hwe determinations in last 7 rows of this table. Last (modern) shell age (Nielsen, E., McKillop, W.B., and McCoy, J.P., 1982, The age of the Hartman moraine and the Campbell beach of Lake Agassiz in northwestern Ontario: Canadian Journal of Earth Sciences, v. 19, p. 1933-1937) corrected for fossil fuel effect following Rea, D.K., and Colman, S.M., 1995, Radiocarbon ages of pre-bomb clams and the hard-water effect in Lakes Michigan and Huron: Journal of Paleolimnology, v. 14, p. 89-91, and Moore, T.C., Jr., Rea, D.K., and Godsey, H.S., 1998, Regional variation in radiocarbon ages and the hard-water effects in Lakes Michigan and Huron: Journal of Paleolimnology, v. 20, p. 347-351.

\*\*fossil introduced below Lake Winnipeg sediment possibly by bioturbation (221, 222), or ice scour (223).

TABLE 4. AGE DETERMINATIONS OF CORE 103 SEDIMENTS BY CORRELATION OF PALEOMAGNETIC INCLINATION FEATURES TO SIMILAR FEATURES IN OTHER RADIOCARBON-DATED LAKE SEDIMENTS\*

| Core depth (cm)* | Inclination feature* | Conventional 14C age (ka B.P.)* | Calibrated age (cal. yrs B.P.) and sigma age range <sup>†</sup> | Core depth range <i>D</i> (m) | Equations for model age <sup>§</sup> AG (ka B.P.) at core depth <i>D</i> (m)                                                                                |
|------------------|----------------------|---------------------------------|-----------------------------------------------------------------|-------------------------------|-------------------------------------------------------------------------------------------------------------------------------------------------------------|
| 0                |                      | 0                               | 0                                                               | 0-2.01                        | $AG = 0.00071 + 1.76754D - 0.35954D^2$<br>Data points = 6; $R^2$ (degree 1) = 0.943<br>$R^2$ (degree 2) = 0.999                                             |
| 58               | 1                    | 0.915 Å 130                     | (810) 950-690                                                   | 1.99-4.99                     | $AG = -2.4986 + 2.7957D - 0.24562D^2$<br>Data points = 6; $R^2$ (degree 1) = 0.957<br>$R^2$ (degree 2) = 0.998                                              |
| 94               | 2                    | 1.325 Å 140                     | (1270) 1340-1080                                                |                               |                                                                                                                                                             |
| 112              | 3                    | 1.523 Å 90                      | (1400) 1520-1320                                                |                               |                                                                                                                                                             |
| 130              | 4                    | 1.71 Å 120                      | (1610) 1740-1510                                                |                               |                                                                                                                                                             |
| 200              | 5                    | 2.095 Å 170                     | (2060) 2330-1880                                                |                               |                                                                                                                                                             |
| 225              | 6                    | 2.515 Å 140                     | (2720) 2770-2360                                                | 4.97-5.21<br>5.19-6.86        | $AG = -19.6179 + 5.0136D$ Data = 2; $R^2 = 1$<br>$AG = 0.98598 + 1.6295D - 0.11119D^2$<br>Data points = 3; $R^2$ (degree 1) = 0.968<br>$R^2$ (degree 2) = 1 |
| 270              | 7                    | 3.338 Å 330                     | (3570) 3980-3220                                                |                               |                                                                                                                                                             |
| 319              | 8                    | 3.948 Å 260                     | (4410) 4830-3990                                                |                               |                                                                                                                                                             |
| 375              | 9                    | 4.456 Å 190                     | (5050) 5430-4840                                                |                               |                                                                                                                                                             |
| 498              | 9.5                  | 5.35 Å 200                      | (6180) 6310-5910                                                |                               |                                                                                                                                                             |
| 520              | 10                   | 6.453 Å 260                     | (7410) 7590-7030                                                |                               |                                                                                                                                                             |
| 604              | 11                   | 6.772 Å 160                     | (7610) 7740-7490                                                |                               |                                                                                                                                                             |
| 685              | 12                   | 6.931 Å 170                     | (7740) 7940-7600                                                |                               |                                                                                                                                                             |

\*From Todd et al., 2000.

<sup>†</sup>Calibrated with the program CALIB4.3 by using 1998 atmospheric decadal data set (Stuiver et al., 1998) and 50-year moving average.<sup>§</sup>Model curve fitted with the program GRAPHER;  $R^2$  = coefficient of determination.

TABLE 5. HYDROLOGICAL PARAMETERS FOR CLIMATES AND CLIMATE-SUSTAINABLE LAKE AREAS

| Climate                                  | $q$<br>runoff<br>(mm/y) <sup>r*</sup> | $e_p$<br>potential<br>evaporation<br>(mm/y) <sup>†</sup> | $p$<br>precipitation<br>(mm/y) | Source or comment                                                                                                                                     | $p - e_p$<br>(mm/yr) | Change in<br>$p - e_p$ from<br>modern<br>climate<br>(mm/yr) | Lake<br>area $A$<br>(km <sup>2</sup> ) <sup>§</sup> |
|------------------------------------------|---------------------------------------|----------------------------------------------------------|--------------------------------|-------------------------------------------------------------------------------------------------------------------------------------------------------|----------------------|-------------------------------------------------------------|-----------------------------------------------------|
| Modern                                   | 145                                   | 700                                                      | 550                            | Average of parameter ranges in Lake Winnipeg watershed from CNCIHD, 1978, hereafter HAC, 1978                                                         | -150                 | 0                                                           | 483 120                                             |
| Grassland Border                         | 15                                    | 700                                                      | 380                            | Selected from HAC, 1978 for the boundary zone between grassland and forest vegetation near Saskatoon, Saskatchewan                                    | -320                 | -170                                                        | 44 010                                              |
| Central Grassland                        | 4                                     | 940                                                      | 300                            | Selected from HAC, 1978 for the drier area of grassland near Medicine Hat, Alberta                                                                    | -640                 | -490                                                        | 6 100                                               |
| Central Grassland<br>(suppressed runoff) | 1                                     | 940                                                      | 300                            | A drier version of the central-grassland climate representing the effective climate in the desiccated middle Holocene southern basin of Lake Winnipeg | -640                 | -490                                                        | 1 530                                               |

\*Runoff is given per unit area of the land portion of the drainage basin.

†Evaporation is lake or potential evaporation.

§Lake area,  $A$ , is the maximum steady-state climate-sustainable lake area for the present Lake Winnipeg basin (982 900 km<sup>2</sup>). Compare with the present area of Lake Winnipeg (24 400 km<sup>2</sup>) or with the combined lake area of 34 900 km<sup>2</sup> for the large lakes Winnipeg, Manitoba and Winnipegosis in the Lake Winnipeg basin (Fig. 1). Lake Winnipeg would not be supported as an open, overflowing lake by the Central Grassland climate.

**Figure R1. Lake Winnipeg sediment properties at sites in the southern basin (221), and northern basin (201 and 103). (A) Sediment lithology recovered by piston cores superimposed on boomer seismic profiles (2-6 kHz) showing the erosional contact at the regional unconformity (U) between Lake Winnipeg sediments above (light gray) and glacial Lake Agassiz sediments below (dark gray) (Todd et al., 1996, 1998, 2000). A dry crumbly zone characterizes the upper few decimeters of Lake Agassiz sediments in cores 221 and 201 but not 103. (B) Physical properties of cores showing enhanced magnetic susceptibility, bulk density, and shear strength in the surface zone of Lake Agassiz sediments at sites 221 and 201 (Todd et al., 2000; Moran and Jarrett, 1998) in association with the dry crumbly zone shown in (A) are attributed to desiccation. Site 103 (north-central northern basin) was always inundated and does not show attributes of desiccation (Todd et al., 1996; Moran and Jarrett, 1998). (C) Downcore oxygen isotope ratios (Todd et al., 1996) at site 103 for surface waters (algal cellulose in sediment organic matter, Buhay and Betcher, 1998) and average bottom waters (pore water) showing closed lake conditions prior to 4.7 ka (chronology based on paleomagnetic age determination in Table 4) when surface-water ratios differed most from those of average bottom water, indicating surface enrichment by periods of enhanced evaporation. Aquatic-cellulose enhanced  $\delta^{18}\text{O}$  ratios record primary biological productivity in evaporatively -stressed surface waters, whereas pore water, whose isotope signals here resemble entrapped bottom water rather than inflowing groundwater, exhibits average paleo - lake-water  $\delta^{18}\text{O}$  values (Todd et al., 1996; Buhay and Betcher, 1998).**

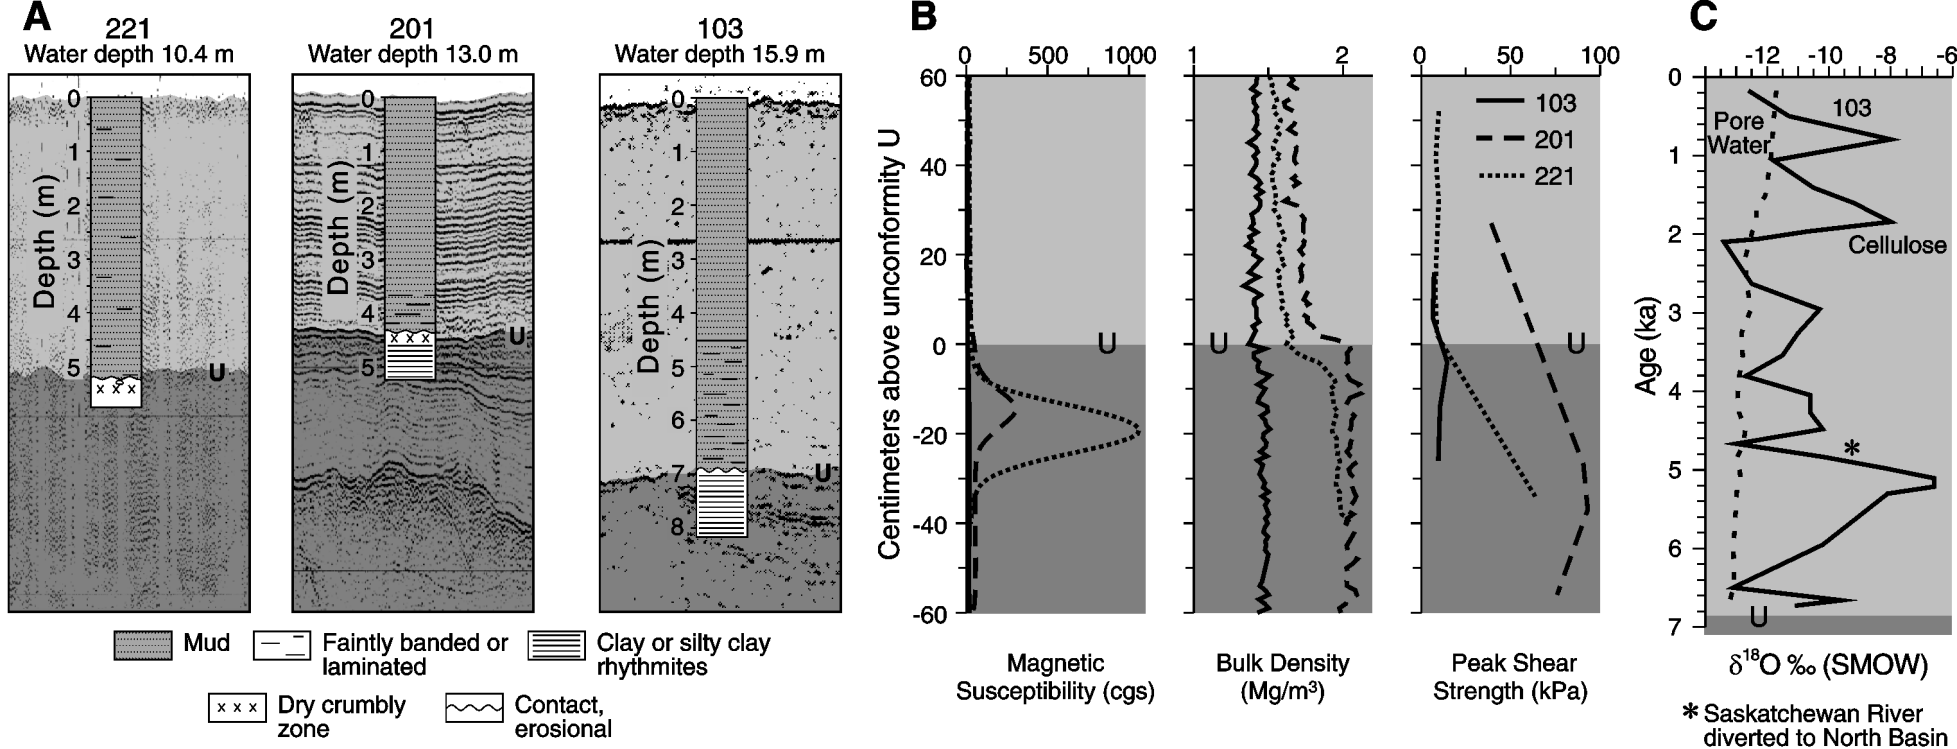

Supplement: Supplementary file 1 [file 22743395]
